# Supplementary material for: Hinokitiol up-regulates miR-494-3p to suppress BMI1 expression and inhibits self-renewal of breast cancer stem/progenitor cells
Source: PubMed Central journal article supplement (PMC5652685; doi:10.18632/oncotarget.18648), 2017-06-27
Supplement: oncotarget-08-76057-s001.pdf [file oncotarget-08-76057-s001.pdf]

## Hinokitiol up-regulates miR-494-3p to suppress BMI1 expression and inhibits self-renewal of breast cancer stem/progenitor cells

### SUPPLEMENTARY MATERIALS

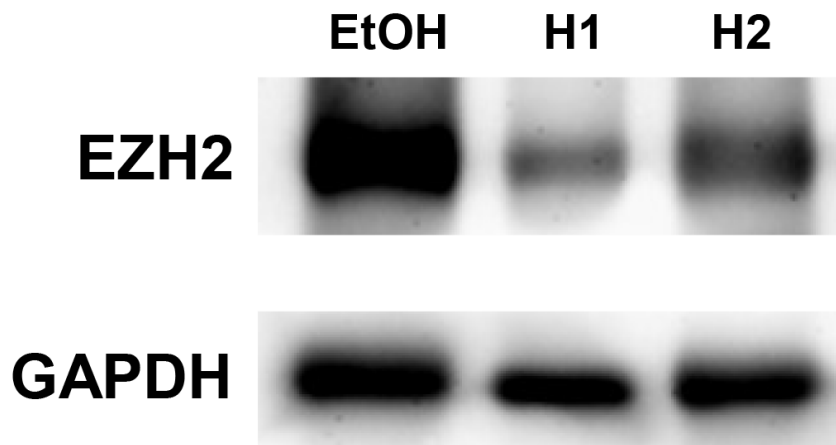

**Supplementary Figure 1: Hinokitiol inhibited EZH2 expression in BT-474 xenograft.** Total proteins were extracted from xenograft tumors of ethanol- (EtOH) or hinokitiol (H1 and H2)-treated mice and separated by SDS-PAGE. EZH2 expression was determined by western blot analysis. GAPDH was used as internal control.
